# Supplementary figures and images for: Synergistic effect of amino-acids and metal salts as draw solutions to enhance the performance of fertilizer-drawn forward osmosis
Source: Royal Society of Chemistry journal article supplement (doi:10.1039/d0ew00599a), 2020-01-01

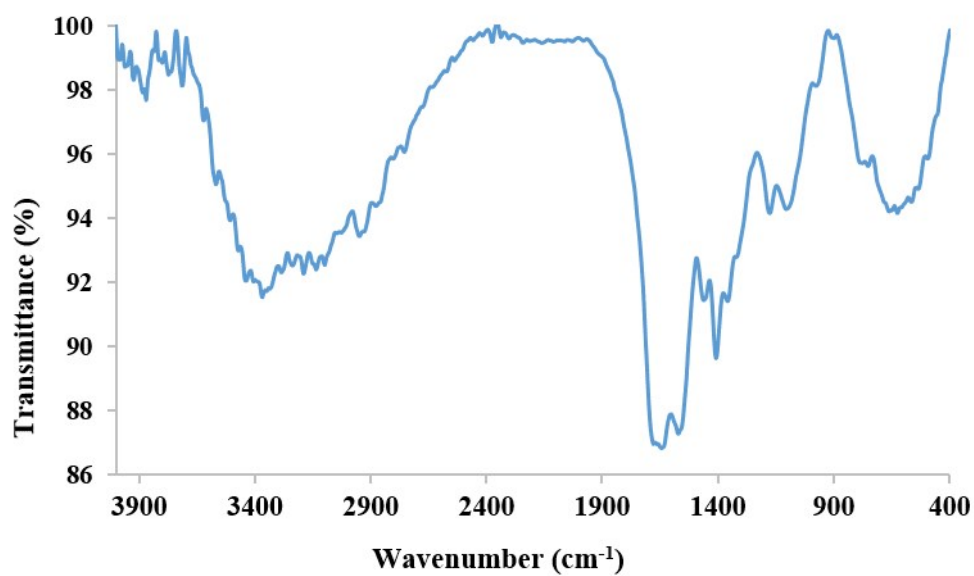

**Figure S1.** FTIR analysis of ZnCl<sub>2</sub>-Arg draw solution.

Supplement: d0ew00599a1.pdf [file d0ew00599a1.pdf]
